# Supplementary material for: Water motion-controlled reversible phase transition and de/absorption-controlled reversible phase transformation in the hydrate crystal (BEDABCO)ClO4·H2O and its analogs
Source: Royal Society of Chemistry journal article supplement (doi:10.1039/c6ce00854b), 2016-01-01
Supplement: c6ce00854b1.pdf [file c6ce00854b1.pdf]

## Supporting information

Water motion-controlled reversible phase transition and de/absorption-controlled reversible phase transformation in hydrate crystal (BEDABCO)ClO<sub>4</sub>·H<sub>2</sub>O and its analogs

Xiang-Bin Han,\* Jing-Mei Xiao

College of Chemistry and Chemical Engineering, Southeast University, Nanjing 211189, Jiangsu, China.

### Contents:

Experimental section

Table S1 Crystal data of **1** – **4**

Table S2 Hydrogen bond of crystal **3** and **4** at 293 K (Å, °).

Table S3 Atomic coordinates ( $10^4$ ) and equivalent isotropic displacement parameters ( $\text{Å}^2 \cdot 10^3$ ) for O5 in crystal **1** at 343 K, 333 K and 293 K.  $U_{\text{eq}}$  is defined as one third of the trace of the orthogonalized  $U_{ij}$  tensor.

Figure S1 IR spectra of (a) **1** and **2** and (b) **3** and **4**.

Figure S2 Dielectric spectra of **2(a)**, **3(b)**, **4(c)**.

Figure S3 Differential scanning calorimetry (DSC) of **3(a)**, **4(b)**.

Figure S4 Powder X-ray diffraction patterns of **2(a)**, **3(b)**, **4(c)**.

Figure S5 Cycle of dielectric spectra of **3(a)**, **4(b)** at 1MHz upon the cooling.

Figure S6 Variable temperatures IR spectra of **1(a)**, **3(b)**, **4(c)** at 293 K, 313 K, 333 K, and 353K.

## **Experimental section**

### **Materials and methods**

All the analytical grade chemicals were used as received without further purification. Elemental analysis was performed on a vario MICRO analyzer. Infrared (IR) spectra were recorded on a Nicolet 5700 spectrometer. Thermogravimetric analysis (TGA) was carried out on a METTLER TOLEDO STARE System. Measurements of differential scanning calorimetry (DSC) were performed on a Perkin-Elmer Diamond DSC instrument from 130 to 293 K and the heating rate is 10 K/min at atmospheric pressure. Powder X-ray diffraction (PXRD) was measured on a Rigaku SmartLab X-ray diffraction instrument. Dielectric measurements were performed on a TongHui 2828 impedance Analyzer over the frequency range from 500 Hz to 1 MHz and the temperature range from 280 to 360 K with an applied electric field of 1.0 V.

### **Synthesis of compounds 1 – 4**

#### **Compound 1-2**

1,4-Diazabicyclo [2.2.2]octane (1.12 g, 10 mmol) and 1,2-dibromoethane (1.88 g, 10 mmol) were mixed in 20 ml of chloroform and refluxed at 343 K for 4 hours. then filter the solid in the solution and dissolve these solid into 20 ml water and add  $\text{NaClO}_4 \cdot \text{H}_2\text{O}$  (1.4046 g, 10 mmol) with stirring, after several days, colorless crystals **1** were obtained by slow evaporation the solvent with a yield of 74%.

Crystals of **2** were obtained via re-crystallizing compound **1** five times in  $\text{D}_2\text{O}$ .

#### **Compound 3**

1,4-Diazabicyclo [2.2.2]octane (1.12 g, 10 mmol) and 1-Bromo-2-chloroethane (1.43 g, 10 mmol) were mixed in 20 ml of chloroform and refluxed at 343 K for 4 hours. then filter the solid in the solution and dissolve these solid into 20 ml water and add  $\text{NaClO}_4 \cdot \text{H}_2\text{O}$  (1.4046 g, 10 mmol) with stirring, after several days, colorless crystals **3** were obtained by slow evaporation the solvent with a yield of 84%.

#### **Compound 4**

1,4-Diazabicyclo [2.2.2]octane (1.12 g, 10 mmol) and 1-Bromo-2-chloroethane (1.43 g, 10 mmol) were mixed in 20 ml of chloroform and refluxed at 343 K for 4 hours.

then filter the solid in the solution and dissolve these solid into 20 ml water and add NaBF<sub>4</sub>·H<sub>2</sub>O (1.10 g, 10 mmol) with stirring, after several days, colorless crystals **4** were obtained by slow evaporation the solvent with a yield of 68%.

### Crystal structure measurement

Single-crystal data of **1** were collected at different temperatures on a Rigaku Saturn 724<sup>+</sup> diffractometer equipped with a Rigaku low-temperature gas spray cooler device by using Mo-K $\alpha$  ( $\lambda = 0.71075$  Å) radiation from a graphite monochromator. Data processing was performed using the CrystalClear software package (Rigaku, 2005). The structures were solved by direct methods and successive Fourier synthesis and then refined by full-matrix least-squares refinements on  $F^2$  using the SHELXL-2014 software package. Hydrogen atoms bonded to the carbon atoms were placed in calculated positions and refined as a riding mode, with C–H = 0.96 Å (methylene) with  $U_{\text{iso}}(\text{H}) = 1.2 U_{\text{eq}}(\text{C})$ . Summary of crystallographic data for the compounds are given in Table 1. CCDC 1473188-1473193 contain the supplementary crystallographic data for **1**. These data can be obtained free of charge via <http://www.ccdc.cam.ac.uk/conts/retrieving.html>, or from the Cambridge Crystallographic Data Centre, 12 Union Road, Cambridge CB2 1EZ, UK; fax: +44 1223-336-033; or e-mail: [deposit@ccdc.cam.ac.uk](mailto:deposit@ccdc.cam.ac.uk).

Table S1 Crystal data of **1**

|                | <b>1</b>                                                         |                                                                  |                                                                  |
|----------------|------------------------------------------------------------------|------------------------------------------------------------------|------------------------------------------------------------------|
| <i>T</i> / K   | 293(2)                                                           | 333(2)                                                           | 343(2)                                                           |
| Formula        | C <sub>8</sub> H <sub>18</sub> BrClN <sub>2</sub> O <sub>5</sub> | C <sub>8</sub> H <sub>18</sub> BrClN <sub>2</sub> O <sub>5</sub> | C <sub>8</sub> H <sub>18</sub> BrClN <sub>2</sub> O <sub>5</sub> |
| Formula weight | 337.59                                                           | 337.59                                                           | 337.59                                                           |
| Crystal system | monoclinic                                                       | monoclinic                                                       | monoclinic                                                       |
| Space group    | <i>P</i> 2 <sub>1</sub> / <i>c</i>                               | <i>P</i> 2 <sub>1</sub> / <i>c</i>                               | <i>P</i> 2 <sub>1</sub> / <i>c</i>                               |
| <i>a</i> / Å   | 10.980(2)                                                        | 11.055(6)                                                        | 11.067(2)                                                        |
| <i>b</i> / Å   | 10.333(2)                                                        | 10.452(6)                                                        | 10.483(2)                                                        |
| <i>c</i> / Å   | 11.370(2)                                                        | 11.388(6)                                                        | 11.404(2)                                                        |
| $\alpha$ / °   | 90                                                               | 90                                                               | 90                                                               |
| $\beta$ / °    | 93.92(3)                                                         | 94.249(9)                                                        | 94.32(3)                                                         |
| $\gamma$ / °   | 90                                                               | 90                                                               | 90                                                               |

|                                                               |                |                |                |
|---------------------------------------------------------------|----------------|----------------|----------------|
| $V / \text{\AA}^3$                                            | 1287.0(5)      | 1312.3(12)     | 1319.3(5)      |
| $Z$                                                           | 4              | 4              | 4              |
| $D_{\text{calc}} / \text{g}\cdot\text{cm}^{-3}$               | 1.742          | 1.709          | 1.700          |
| $\mu / \text{mm}^{-1}$                                        | 3.413          | 3.348          | 3.330          |
| $F(000)$                                                      | 688            | 688            | 688            |
| $\theta$ range / °                                            | 3.180–27.469   | 2.685–27.556   | 3.146–27.474   |
| Reflns collected                                              | 8773           | 14041          | 4766           |
| Independent reflns ( $R_{\text{int}}$ )                       | 2954 (0.0424)  | 3029 (0.0597)  | 3022 (0.0669)  |
| no. parameters                                                | 160            | 160            | 160            |
| $R_1^{[\text{a}]}$ , $wR_2^{[\text{b}]}$ [ $I > 2\sigma(I)$ ] | 0.0427, 0.0921 | 0.0521, 0.0974 | 0.0576, 0.1074 |
| $R_1$ , $wR_2$ [all data]                                     | 0.0558, 0.098  | 0.0800, 0.1070 | 0.1310, 0.1336 |
| GOF                                                           | 1.088          | 1.110          | 0.972          |
| $\Delta\rho^{[\text{c}]} / \text{e}\cdot\text{\AA}^{-3}$      | 0.403, –0.704  | 0.475, –0.524  | 0.347, –0.422  |

<sup>[a]</sup>  $R_1 = \sum||F_o| - |F_c||/\sum|F_o|$ . <sup>[b]</sup>  $wR_2 = [\sum w(F_o^2 - F_c^2)^2/\sum w(F_o^2)^2]^{1/2}$ . <sup>[c]</sup> Maximum and minimum residual electron density.

Table S1 Crystal data of **2-4**

|                                                               | <b>2</b>                                                     | <b>3</b>                                                 | <b>4</b>                                                 |
|---------------------------------------------------------------|--------------------------------------------------------------|----------------------------------------------------------|----------------------------------------------------------|
| $T / \text{K}$                                                | 293(2)                                                       | 293(2)                                                   | 293(2)                                                   |
| Formula                                                       | $\text{C}_8\text{H}_{16}\text{BrClID}_2\text{N}_2\text{O}_5$ | $\text{C}_8\text{H}_{18}\text{Cl}_2\text{N}_2\text{O}_5$ | $\text{C}_8\text{H}_{18}\text{BBrF}_4\text{N}_2\text{O}$ |
| Formula weight                                                | 339.60                                                       | 293.14                                                   | 324.95                                                   |
| Crystal system                                                | monoclinic                                                   | monoclinic                                               | monoclinic                                               |
| Space group                                                   | $P2_1/c$                                                     | $P2_1/c$                                                 | $P2_1/c$                                                 |
| $a / \text{\AA}$                                              | 11.018(2)                                                    | 10.919(2)                                                | 10.886(2)                                                |
| $b / \text{\AA}$                                              | 10.388(2)                                                    | 10.331(2)                                                | 10.237(2)                                                |
| $c / \text{\AA}$                                              | 11.406(2)                                                    | 11.330(2)                                                | 11.376(2)                                                |
| $\alpha / ^\circ$                                             | 90                                                           | 90                                                       | 90                                                       |
| $\beta / ^\circ$                                              | 94.03(3)                                                     | 94.06(3)                                                 | 94.16(3)                                                 |
| $\gamma / ^\circ$                                             | 90                                                           | 90                                                       | 90                                                       |
| $V / \text{\AA}^3$                                            | 1302.2(5)                                                    | 1274.9(4)                                                | 1264.4(4)                                                |
| $Z$                                                           | 4                                                            | 4                                                        | 4                                                        |
| $D_{\text{calc}} / \text{g}\cdot\text{cm}^{-3}$               | 1.732                                                        | 1.527                                                    | 1.707                                                    |
| $\mu / \text{mm}^{-1}$                                        | 3.373                                                        | 0.521                                                    | 3.286                                                    |
| $F(000)$                                                      | 688                                                          | 616                                                      | 585                                                      |
| $\theta$ range / °                                            | 3.165–27.482                                                 | 3.187–27.482                                             | 3.196–27.484                                             |
| Reflns collected                                              | 13080                                                        | 8606                                                     | 8495                                                     |
| Independent reflns ( $R_{\text{int}}$ )                       | 2988 (0.0766)                                                | 2932 (0.0300)                                            | 2898 (0.0802)                                            |
| no. parameters                                                | 160                                                          | 161                                                      | 160                                                      |
| $R_1^{[\text{a}]}$ , $wR_2^{[\text{b}]}$ [ $I > 2\sigma(I)$ ] | 0.0460, 0.1014                                               | 0.0436, 0.1037                                           | 0.0649, 0.1464                                           |
| $R_1$ , $wR_2$ [all data]                                     | 0.0634, 0.1094                                               | 0.0569, 0.1105                                           | 0.0984, 0.1692                                           |
| GOF                                                           | 1.045                                                        | 1.055                                                    | 0.967                                                    |
| $\Delta\rho^{[\text{c}]} / \text{e}\cdot\text{\AA}^{-3}$      | 0.489, –0.554                                                | 0.467, –0.321                                            | 0.709, –1.010                                            |

<sup>[a]</sup>  $R_1 = \sum||F_o| - |F_c||/\sum|F_o|$ . <sup>[b]</sup>  $wR_2 = [\sum w(F_o^2 - F_c^2)^2/\sum w(F_o^2)^2]^{1/2}$ . <sup>[c]</sup> Maximum and

minimum residual electron density.

Table S2 Hydrogen bond of crystal **3** and **4** at 293 K (Å, °).

| D-H...A              | d(D-H)    | d(H...A) | d(D...A) | <(DHA) |
|----------------------|-----------|----------|----------|--------|
| 3                    |           |          |          |        |
| O(5)-H(5WA)...N(2)   | 0.833(17) | 2.13(2)  | 2.930(3) | 160(3) |
| O(5)-H(5WB)...O(2)#1 | 0.846(17) | 2.21(2)  | 3.017(3) | 161(3) |
| 4                    |           |          |          |        |
| O(1)-H(1WA)...N(2)   | 0.840(19) | 2.14(4)  | 2.920(6) | 154(7) |
| O(1)-H(1WB)...F(2)#1 | 0.86(2)   | 2.12(3)  | 2.950(6) | 164(6) |

Symmetry code: #1  $x, -y+3/2, z-1/2$ .

Table S3 Atomic coordinates ( $10^4$ ) and equivalent isotropic displacement parameters ( $\text{Å}^2 \cdot 10^3$ ) for O5 in crystal 1 at 343 K, 333 K and 293 K.  $U_{\text{eq}}$  is defined as one third of the trace of the orthogonalized  $U_{ij}$  tensor.

| ATOM  | X       | Y       | Z      | $U_{\text{eq}}$ |
|-------|---------|---------|--------|-----------------|
| 343 K |         |         |        |                 |
| O(5)  | 4821(5) | 8147(7) | 457(5) | 99(2)           |
| 333 K |         |         |        |                 |
| O(5)  | 4812(3) | 8166(4) | 473(4) | 89(1)           |
| 293 K |         |         |        |                 |
| O(5)  | 4817(3) | 8189(3) | 476(3) | 74(1)           |

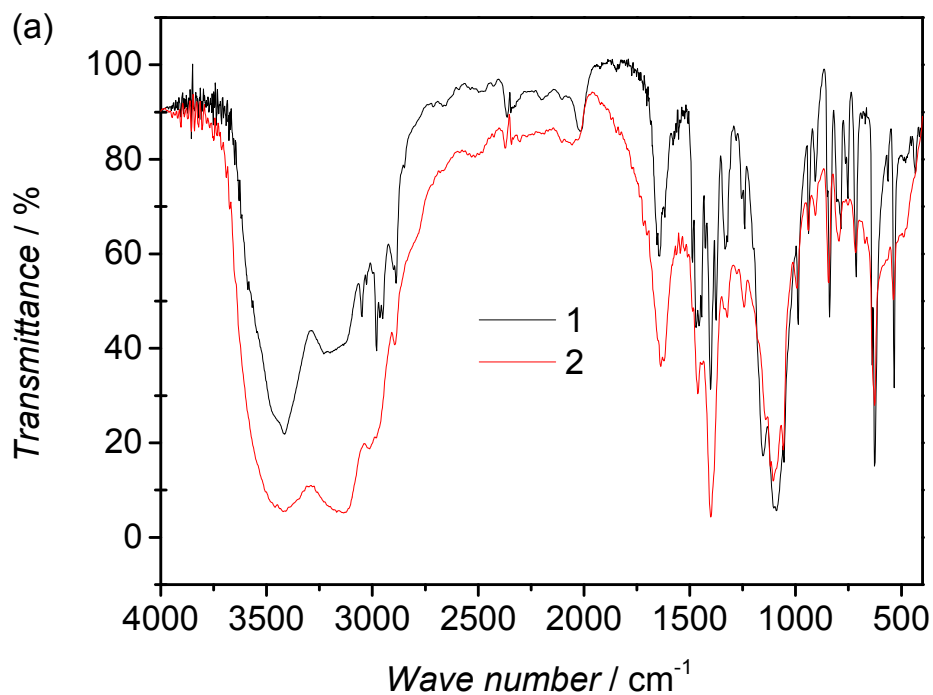

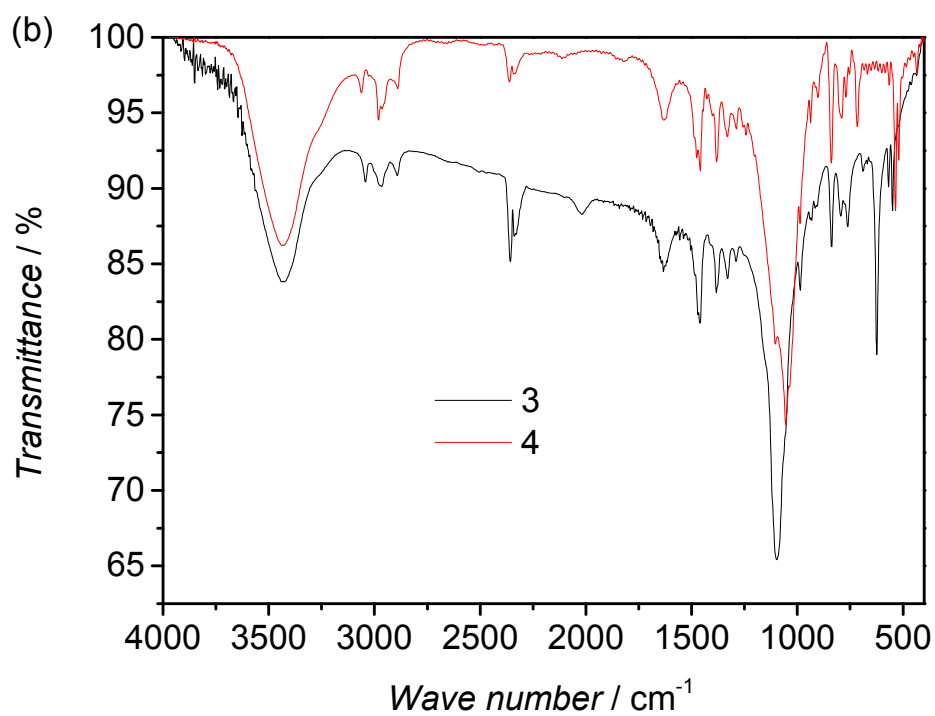

Figure S1 IR spectra of (a) 1 and 2 and (b) 3 and 4.

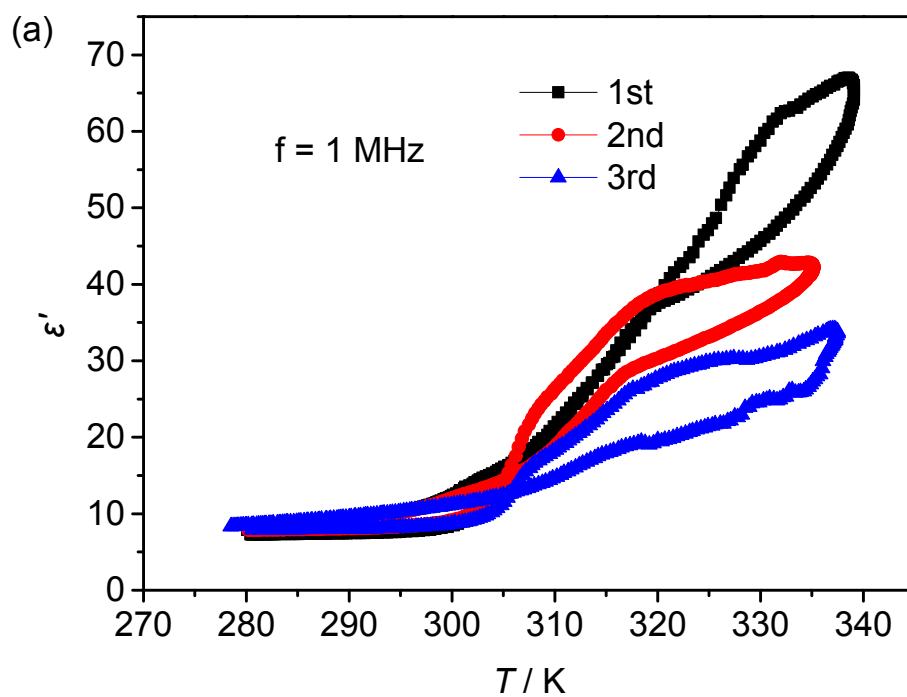

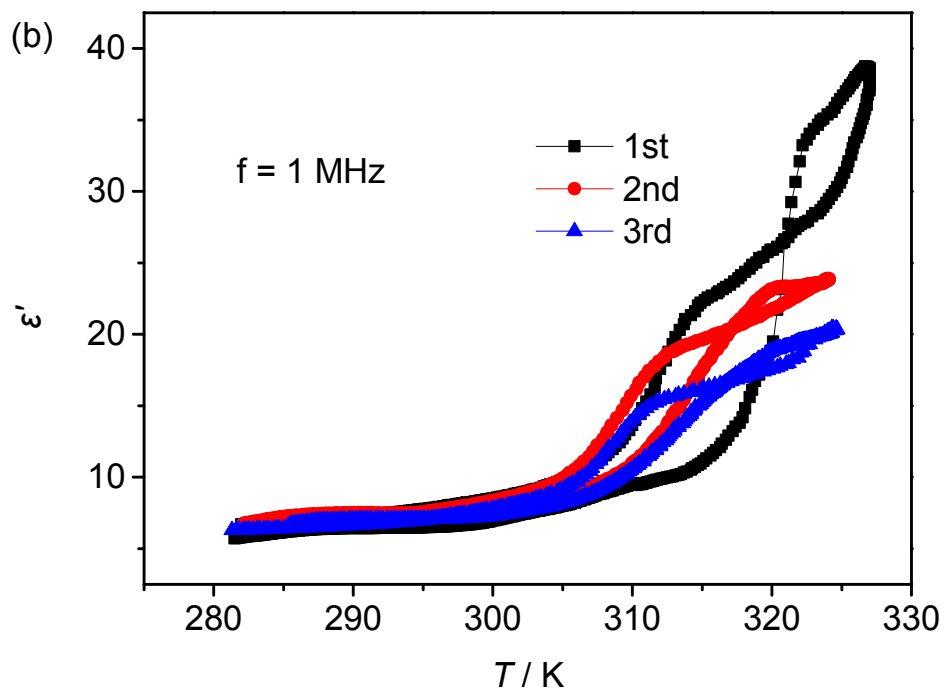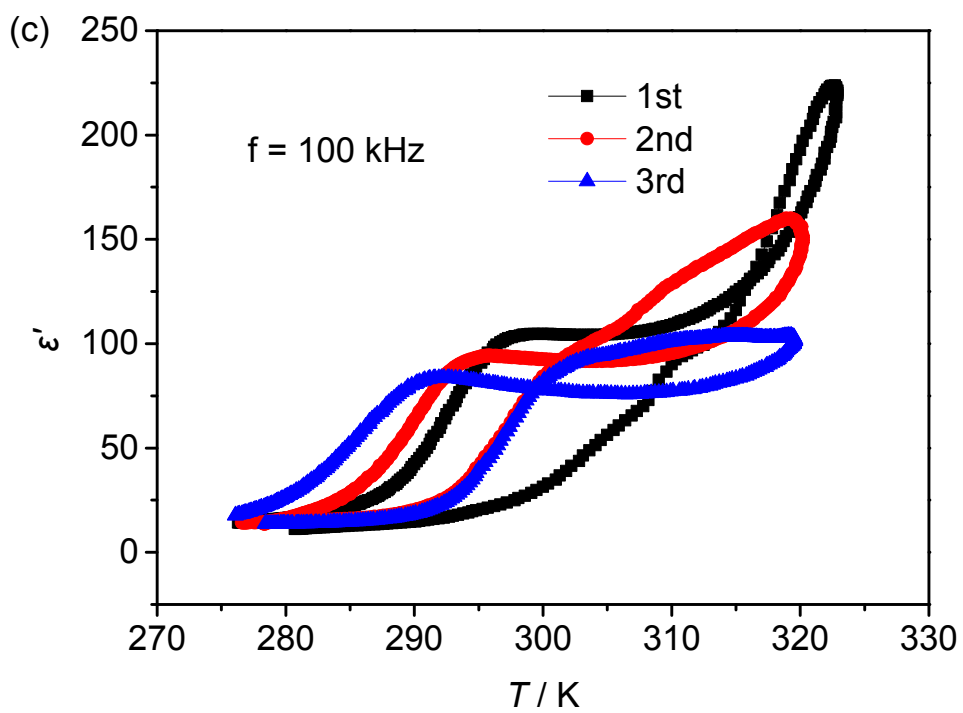

Figure S2 Dielectric spectra of 2(a), 3(b), 4(c).

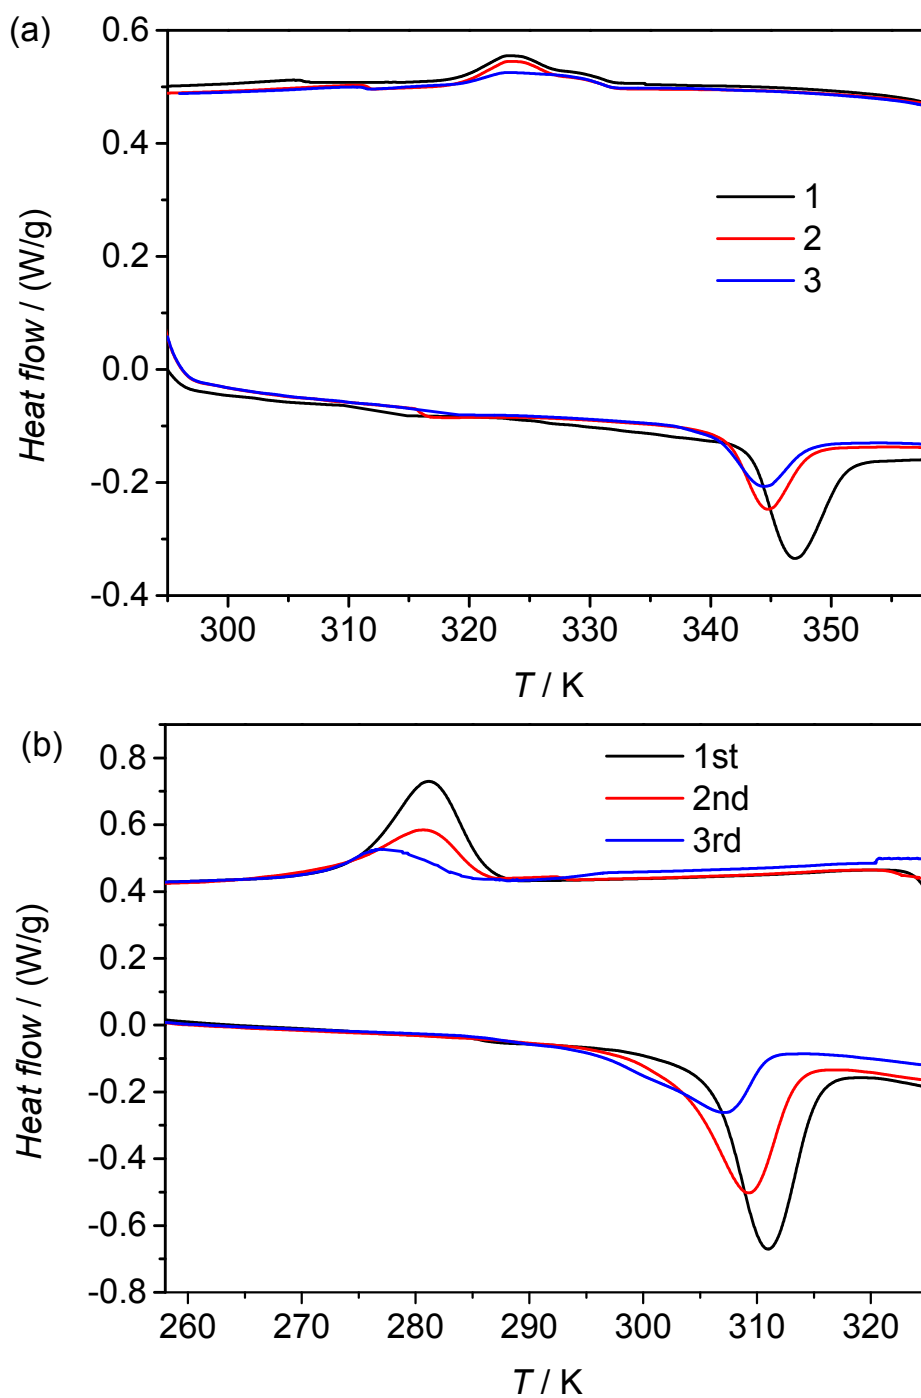

Figure S3 Differential scanning calorimetry (DSC) of 3(a), 4(b).



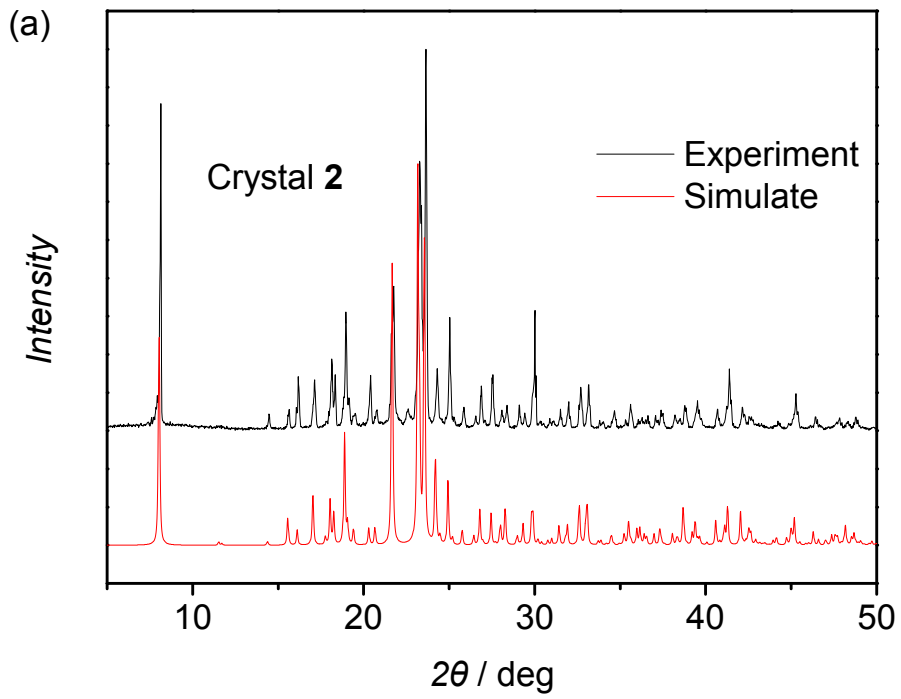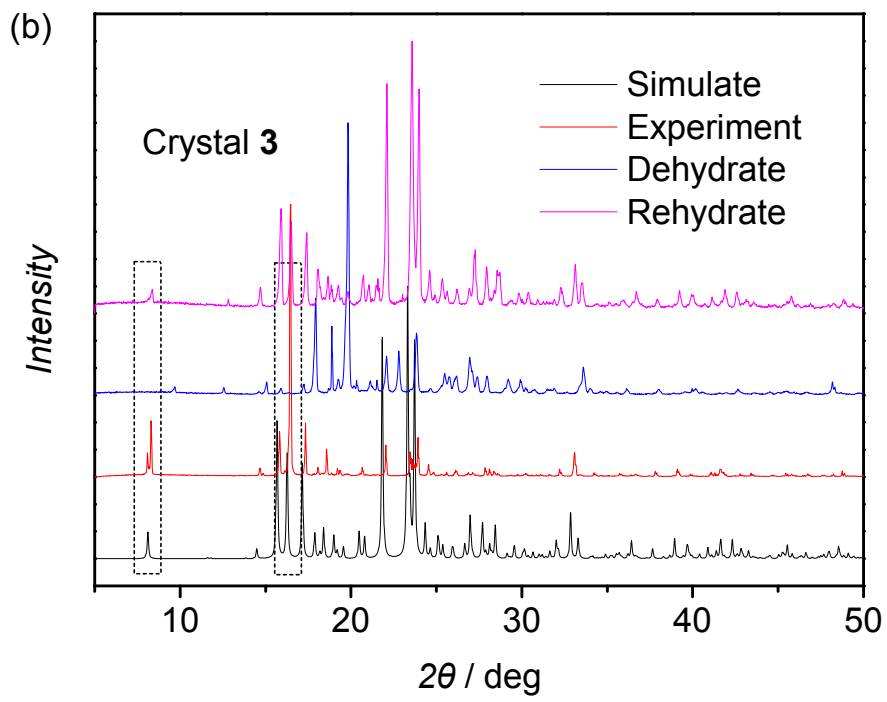

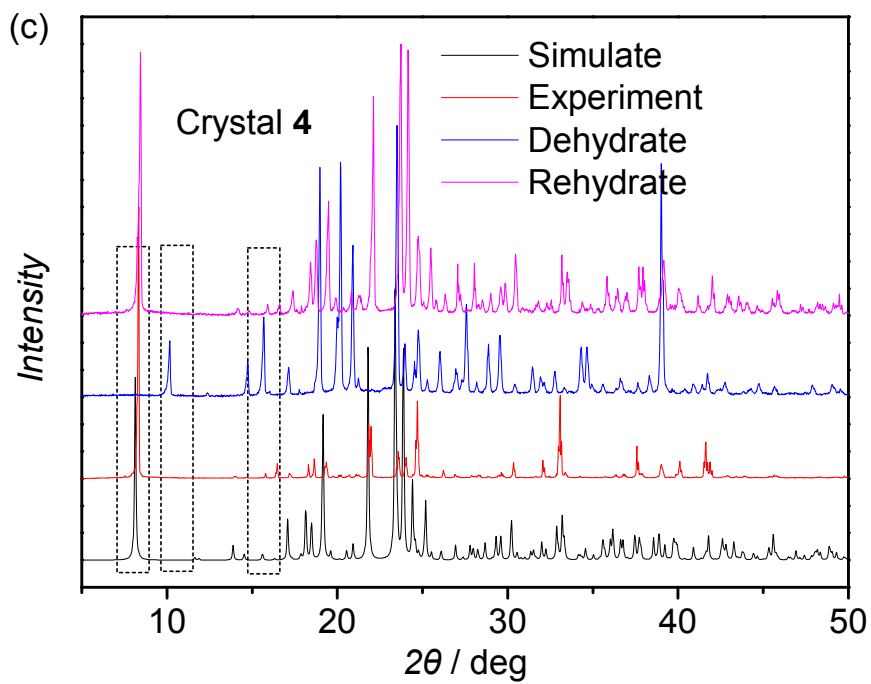

Figure S4 Powder X-ray diffraction patterns of 2(a), 3(b), 4(c).

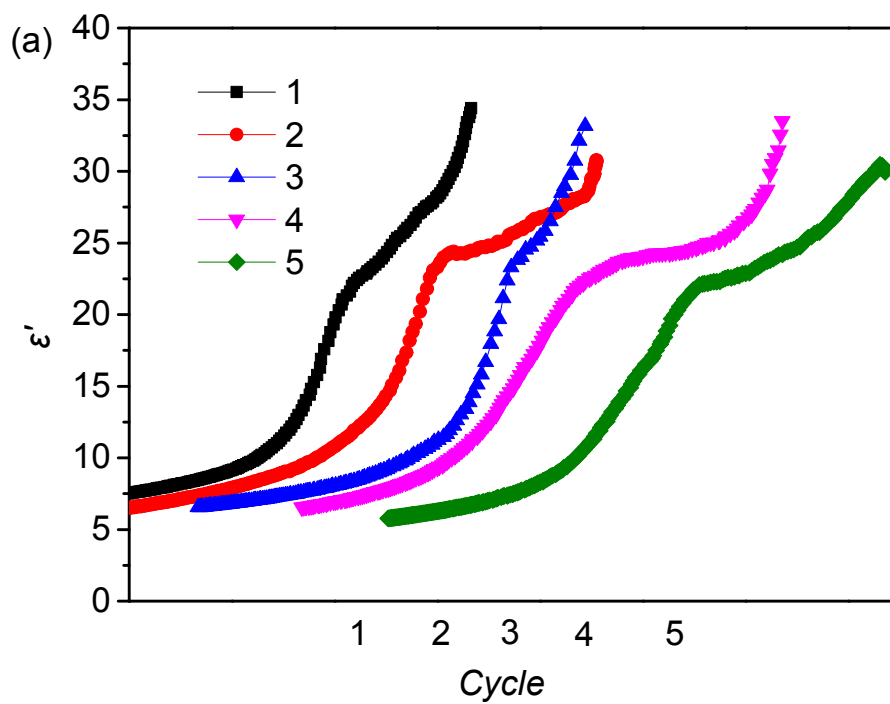

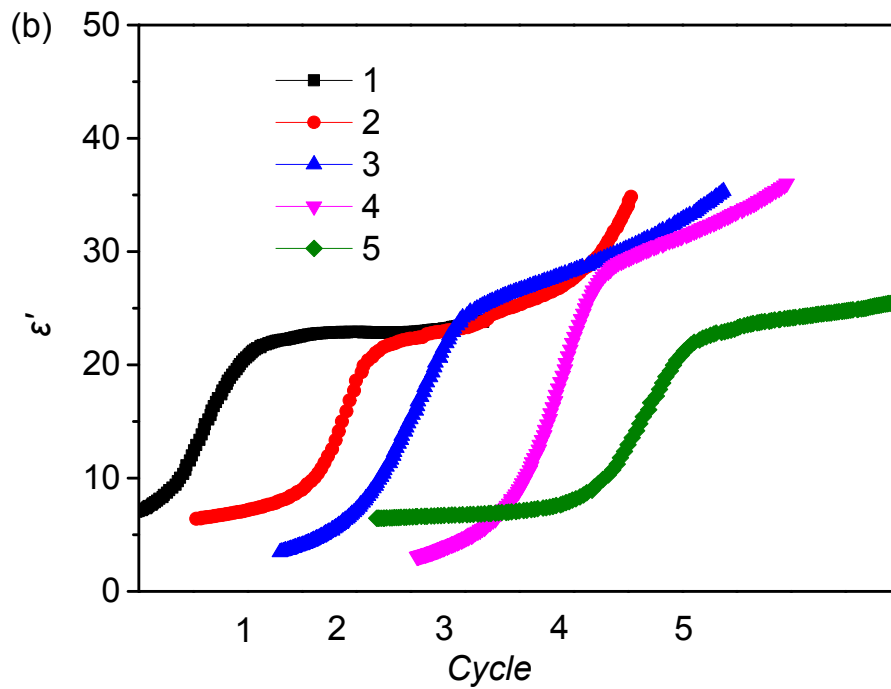

Figure S5 Cycle of dielectric spectra of 3(a), 4(b) at 1MHz upon the cooling.

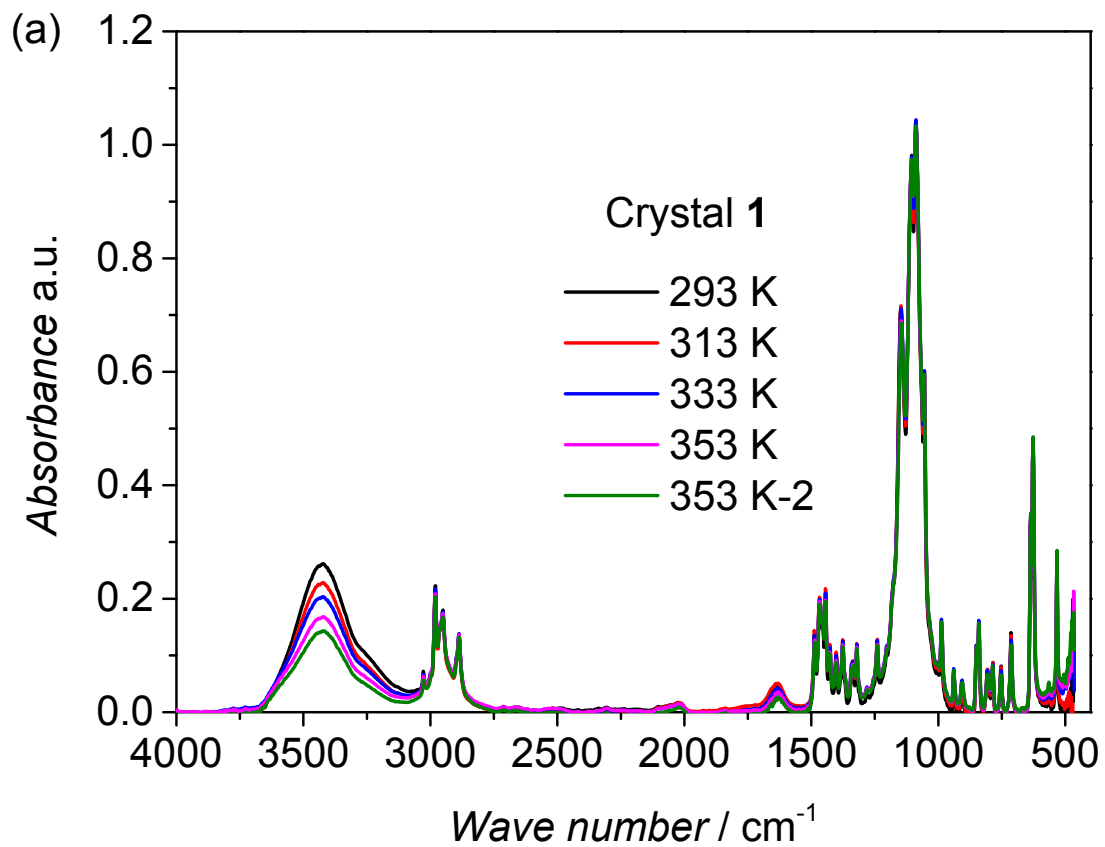

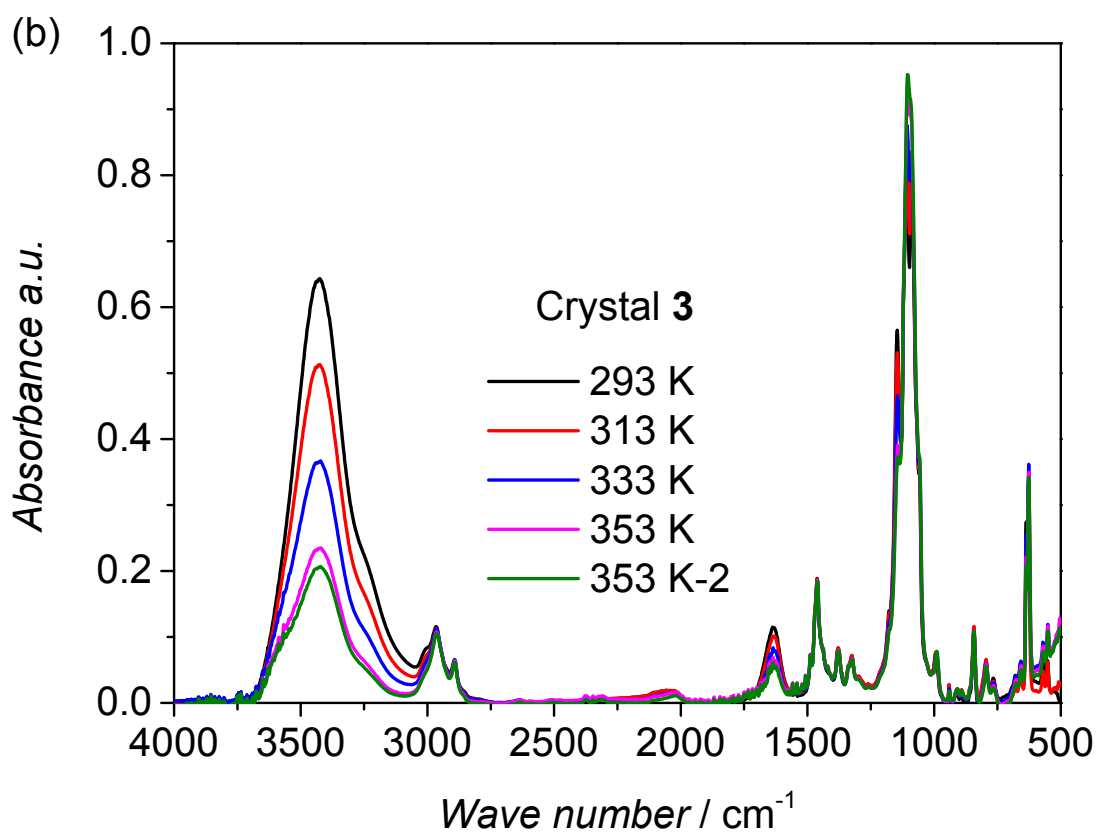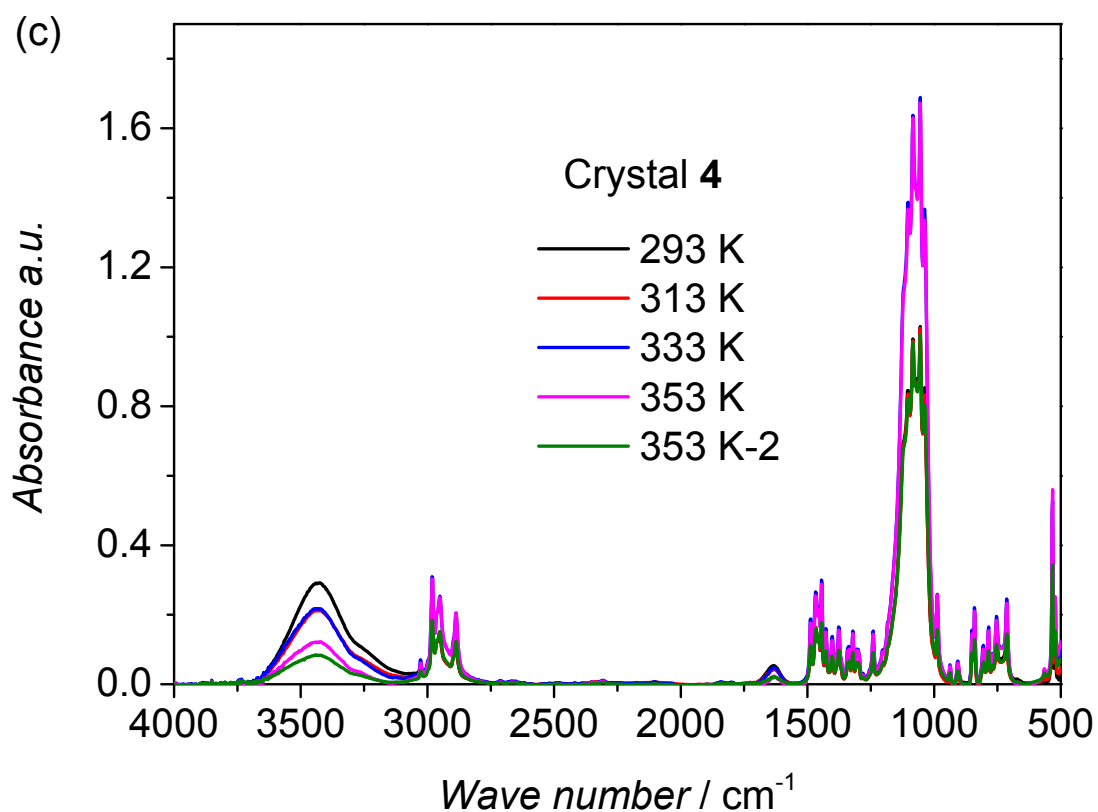

Figure S6 Variable temperatures IR spectra of 1(a), 3(b), 4(c) at 293 K, 313 K, 333 K, and 353 K, 353 K-2 was in-situ temperature data that measured after 5 minutes.
